# Supplementary material for: Eco-efficiency of system alternatives of the urban water-energy-waste nexus
Source: Springer Nature journal article supplement (doi:10.1007/s00550-021-00517-5), 2021-06-01
Supplement: MOESM1 [file 19703416]

Die Ökoeffizienz von Systemalternativen im Wasser-Energie-Abfall Nexus

**Authors: Witold-Roger Pogonietz\*, Jasmin Friedrich, Helmut Lehn**

Karlsruhe Institute of Technology (KIT), Institute for Technology Assessment and Systems Analysis (ITAS), Karlsruhe, Germany

\* Corresponding author: Email: [pogonietz@kit.edu](mailto:pogonietz@kit.edu); phone: +49-721-608 28180

Orcid: 0000-0002-5839-1206.

In the following four tables are presented, which gives additional information regarding the life cycle inventory (LCI) (Tables A1 and A2) and the costs (Tables A3 and A4), differing between system operation (Table A1 and A3) and system construction (Table A2 and A4).

**Table A1: System operation**

| Process                                    | Unit           | SQ                   | SYAL1                | SYAL2                | SYAL3                |
|--------------------------------------------|----------------|----------------------|----------------------|----------------------|----------------------|
| <i>Drinking water</i>                      |                |                      |                      |                      |                      |
| Drinking water consumption                 | m <sup>3</sup> | 195,768              | 142,523              | 106,378              | 106,378              |
| Energy requirement                         | MWh            | 78                   | 57                   | 43                   | 43                   |
| <i>Wastewater and greywater</i>            |                |                      |                      |                      |                      |
| Run-off (collected rainwater)              | m <sup>3</sup> | 282,647              | 183,721              | 84,794               | 0                    |
| Treated wastewater or greywater            | m <sup>3</sup> | <sup>1</sup> 481,215 | <sup>2</sup> 318,603 | <sup>3</sup> 137,683 | <sup>3</sup> 137,683 |
| Energy requirement                         | MWh            | <sup>4</sup> 0       | 368                  | 193                  | 193                  |
| Diesel for road-transport of sewage sludge | Mg             | 0.5                  | --                   | --                   | --                   |
| Recovered heat                             | MWh            | --                   | 1,601                | 2,065                | 2,065                |
| <i>Organic MSW and blackwater</i>          |                |                      |                      |                      |                      |
| Organic MSW generation                     | Mg             | 249.0                | 249.0                | 249.0                | 249.0                |
| Energy requirement organic MSW             | kWh            | 14,938               | 647                  | 7,622                | 7,622                |
| Diesel for road-transport of organic MSW   | Mg             | 0.6                  | 0.2                  | --                   | --                   |
| Blackwater generation                      | m <sup>3</sup> | --                   | 7,641                | 7,641                | 7,641                |
| Energy requirement vacuum systems          | MWh            | --                   | 76                   | 76                   | 76                   |
| Biogas provision                           | MWh            | --                   | 45,565               | 45,565               | 45,565               |
| Recovered phosphorus                       | Mg             | 0.4                  | 3.2                  | 3.2                  | 3.2                  |
| Recovered nitrogen                         | Mg             | 1.7                  | 23.0                 | 23.0                 | 23.0                 |
| Recovered potassium                        | Mg             | 1.1                  | 7.0                  | 7.0                  | 7.0                  |
| <i>Energy requirement of households</i>    |                |                      |                      |                      |                      |
| Space and water heating                    | MWh            | 36,359               | <sup>5</sup> 0       | <sup>5</sup> 0       | <sup>5</sup> 0       |

Notes: -- = not applicable

<sup>1</sup> Wastewater consisting of rainwater, greywater, urine and feces

<sup>2</sup> Greywater plus rainwater

<sup>3</sup> Greywater

4 Is set to zero as the energy expenditure is fully covered by sewage gas and co-incineration

5 Is set to zero as the energy expenditure is fully covered by the biogas production.

Source: Friedrich et al. 2020.

**Table A2: System construction**

| Material     | Unit      | SQ           | SYAL1        | SYAL2        | SYAL3        |
|--------------|-----------|--------------|--------------|--------------|--------------|
| Concrete     | Mg        | 885.0        | 517.7        | 517.6        | 231.3        |
| Steel        | Mg        | 56.5         | 12.6         | 11.3         | 7.2          |
| Gravel       | Mg        | 21.5         | 98.5         | 98.5         | 98.5         |
| Chemicals    | Mg        | 14.3         | 10.1         | 0.0          | 0.0          |
| Cement       | Mg        | 10.6         | 4.0          | 4.0          | 0.0          |
| Iron         | Mg        | 0.1          | 9.4          | 9.4          | 9.4          |
| Ethylene     | Mg        | 0.0          | 0.0          | 11.9         | 11.9         |
| Polyethylene | Mg        | 0.5          | 2.2          | 6.2          | 6.2          |
| Misc.        | Mg        | 7.4          | 11.1         | 10.7         | 9.2          |
| <b>Sum</b>   | <b>Mg</b> | <b>995.9</b> | <b>665.6</b> | <b>669.6</b> | <b>373.7</b> |

Source: Friedrich et al. 2020.

**Table A3: Operating costs**

| Process                                    | Unit        | SQ              | SYAL1           | SYAL2           | SYAL3           |
|--------------------------------------------|-------------|-----------------|-----------------|-----------------|-----------------|
| <i>Drinking water</i>                      |             |                 |                 |                 |                 |
| Drinking water supply                      | kEUR        | 244.8           | 178.2           | 128.2           | 128.2           |
| <i>Wastewater and greywater</i>            |             |                 |                 |                 |                 |
| Wastewater treatment                       | kEUR        | 680.9           | 340.4           | 177.8           | --              |
| Greywater treatment                        | kEUR        | --              | --              | 85.4            | 85.4            |
| Biogas plant                               | kEUR        | --              | 508.1           | 508.1           | 508.1           |
| Wastewater separation                      | kEUR        | --              | 33.1            | 33.1            | 33.1            |
| Shredder                                   | kEUR        | --              | 0.5             | 2.0             | 2.0             |
| Heat exchanger                             | kEUR        | --              | 9.9             | --              | --              |
| Sludge transport vehicle (maintenance)     | kEUR        | 0.4             | --              | --              | --              |
| Coal power plant                           | kEUR        | 0.3             | --              | --              | --              |
| <i>Organic MSW and blackwater</i>          |             |                 |                 |                 |                 |
| Compost plant                              | kEUR        | 0.2             | --              | --              | --              |
| Garbage truck (maintenance)                | kEUR        | 2.3             | 2.3             | --              | --              |
| Fuel costs                                 | kEUR        | 0.9             | 0.3             | --              | --              |
| <b>Annual operating costs</b>              | <b>kEUR</b> | <b>929.8</b>    | <b>1.072.9</b>  | <b>934.4</b>    | <b>756.6</b>    |
| <b>NPV of operating costs over 80 yrs.</b> | <b>kEUR</b> | <b>28,081.1</b> | <b>32,402.5</b> | <b>28,221.3</b> | <b>22,850.5</b> |

Note: -- = not applicable

Table A4: NPV of investment costs incl. reinvestments

| Component                                          | Life span | SQ            | SYAL1         | SYAL2         | SYAL3         |
|----------------------------------------------------|-----------|---------------|---------------|---------------|---------------|
|                                                    | Years     | kEUR          | kEUR          | kEUR          | kEUR          |
| Digging                                            | 0         | 2,260         | 847           | 847           | 445           |
| Sewage treatment plant                             | 30        | 1,422         | 1,422         | --            | --            |
| Sewer system                                       | 80        | 2,543         | 954           | 954           | --            |
| Vehicle sludge transport                           | 15        | 9             | --            | --            | --            |
| Coal power plant                                   | 30        | 141           | --            | --            | --            |
| Garbage truck                                      | 15        | 55            | 55            | --            | --            |
| Toilette system                                    | 30        | 1,894         | 7,425         | 7,425         | 7,425         |
| Composting plant                                   | 25        | 2             | --            | --            | --            |
| Pressure pipe                                      | 60        | --            | 109           | 109           | 109           |
| Vacuum station                                     | 20        | --            | 557           | 557           | 557           |
| Liner and resin                                    | 50        | --            | 559           | 559           | 559           |
| Biogas plant                                       | 20        | --            | 10,314        | 10,314        | 10,314        |
| Heat pump                                          | 20        | --            | 108           | --            | --            |
| Heat exchanger                                     | 50        | --            | 84            | --            | --            |
| Shredder                                           | 20/15*    | --            | 37            | 2,892         | 2,892         |
| Greywater treatment plant and 2 <sup>nd</sup> grid | 20        | --            | --            | 7,323         | 7,323         |
| <b>Investment costs (components)</b>               | --        | <b>8,326</b>  | <b>22,471</b> | <b>30,980</b> | <b>29,624</b> |
| Planning costs (10% of investment costs)           | --        | 833           | 2,247         | 3,098         | 2,962         |
| Investment costs (w/o financing)                   | --        | 9,159         | 24,718        | 34,078        | 32,586        |
| Financing costs                                    | --        | 4,983         | 8,254         | 10,256        | 9,228         |
| <b>Investment costs (total)</b>                    | --        | <b>14,142</b> | <b>32,971</b> | <b>44,334</b> | <b>41,814</b> |

Notes: -- = not applicable

\* = 20 years in case of a centralized shredder; 15 years in case of a de-centralized shredder
